# Supplementary material for: Non-spike and spike-specific memory T cell responses after the third dose of inactivated COVID-19 vaccine
Source: Frontiers journal article supplement (doi:10.3389/fimmu.2023.1139620), 2023-04-11
Supplement: Image_1.pdf [file Image_1.pdf]

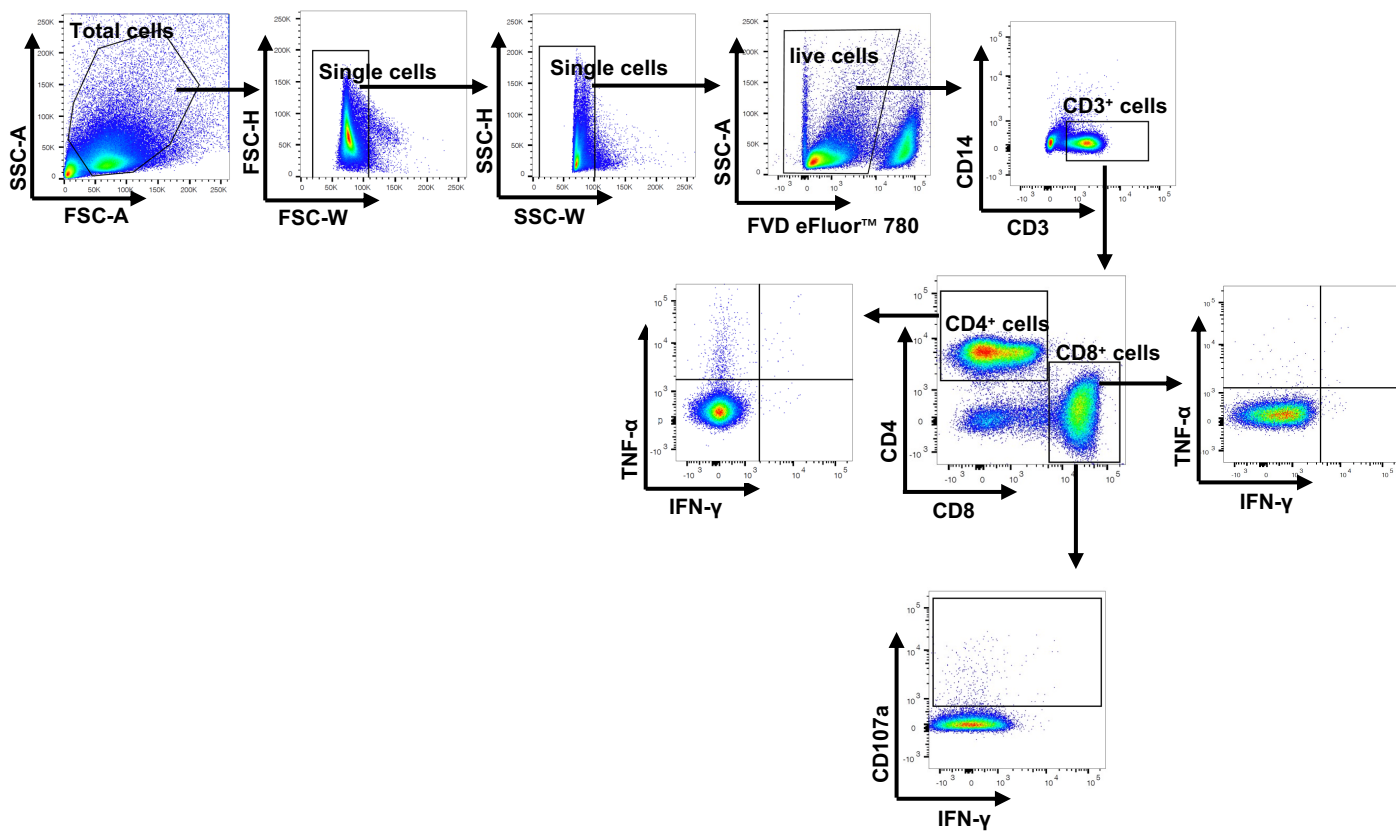

Supplemental Figure 1. Gating strategy for determining cytokine-producing cells among CD4<sup>+</sup> and CD8<sup>+</sup> T cells as well as cytotoxic CD107<sup>+</sup>CD8<sup>+</sup> T cells.

Supplemental Figure 1
