# Supplementary material for: Non-spike and spike-specific memory T cell responses after the third dose of inactivated COVID-19 vaccine
Source: Frontiers journal article supplement (doi:10.3389/fimmu.2023.1139620), 2023-04-11
Supplement: Image_2.pdf [file Image_2.pdf]

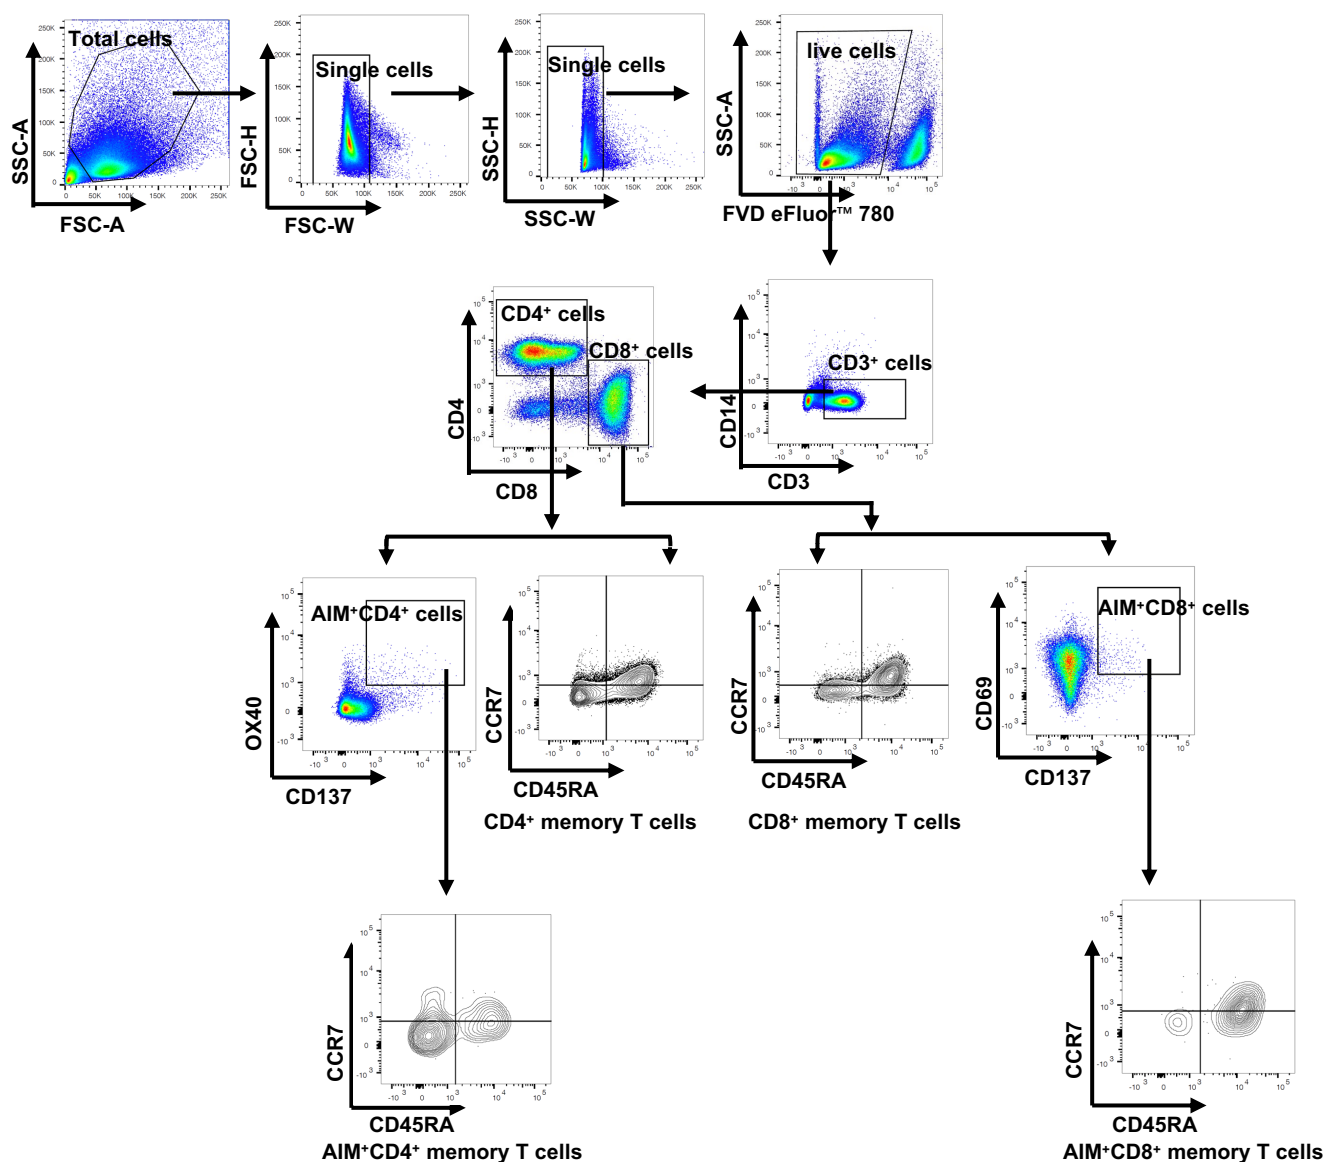

Supplemental Figure 2. Gating strategy for determining AIM<sup>+</sup>CD4<sup>+</sup> (CD137<sup>+</sup>OX40<sup>+</sup>) and AIM<sup>+</sup>CD8<sup>+</sup> (CD137<sup>+</sup>CD69<sup>+</sup>) memory T cells as well as their subpopulations.

Supplemental Figure 2
